# Supplementary material
Source: publisher site journal article supplement (https://www.dovepress.com/article/600632)
Supplement: Supplementary file 1 [file 600632%20Revised%20Supplementary%20Material.pdf]

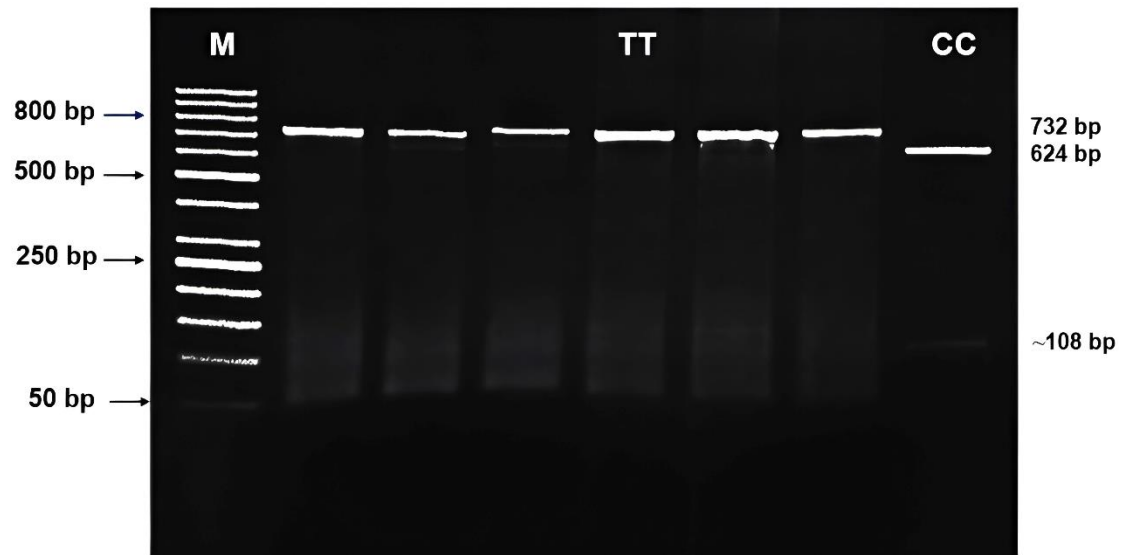

**Figure S1.** Products of the digestion reaction using the XhoI restriction enzyme at the 1860T/C site and the corresponding genotypes of the -1860T>C polymorphism in the Apelin gene. Well, M represents 50 pb DNA Ladder.

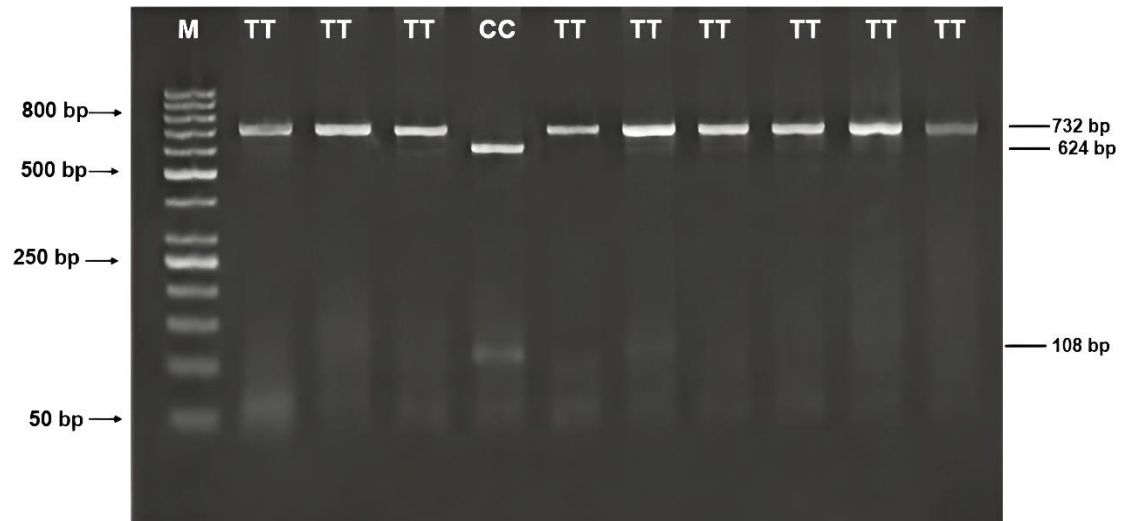

**Figure S2.** Products of the digestion reaction using the XhoI restriction enzyme at the 1860T/C site and the corresponding genotypes of the -1860T>C polymorphism in the Apelin gene. Well, M represents 50 pb DNA Ladder.
